# Supplementary material
Source: ML conference proceedings conference paper supplement (https://openreview.net/forum?id=-h99IwQN-f)

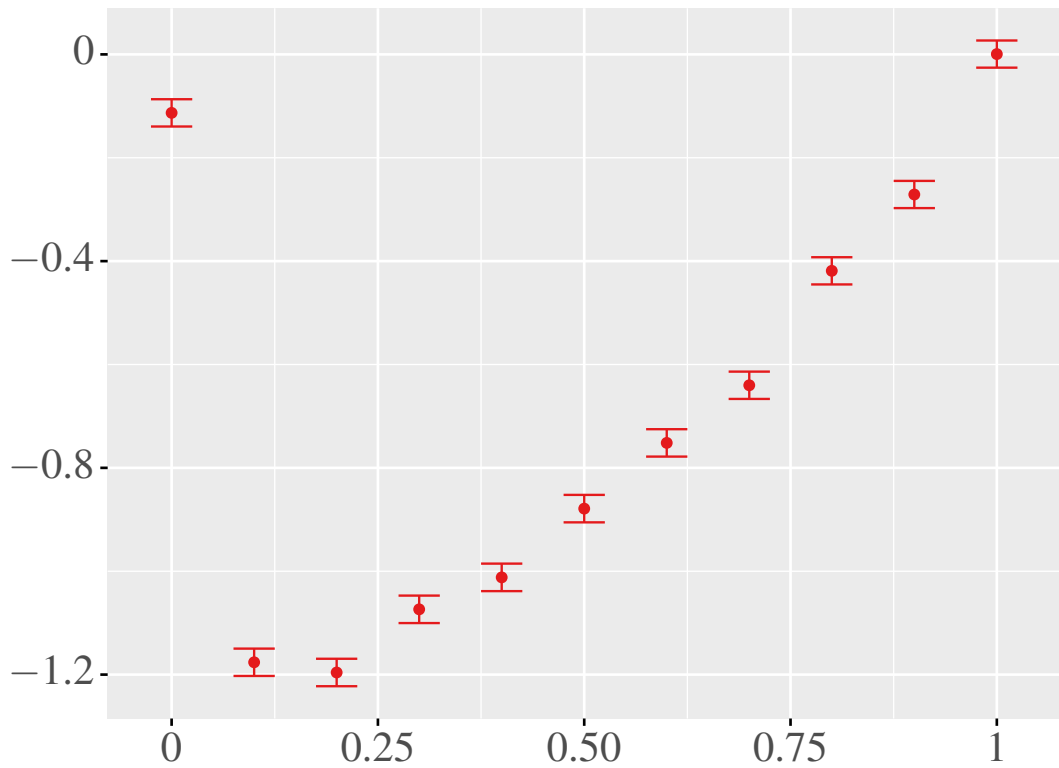

Supplement: supplementary_material [file attachment]

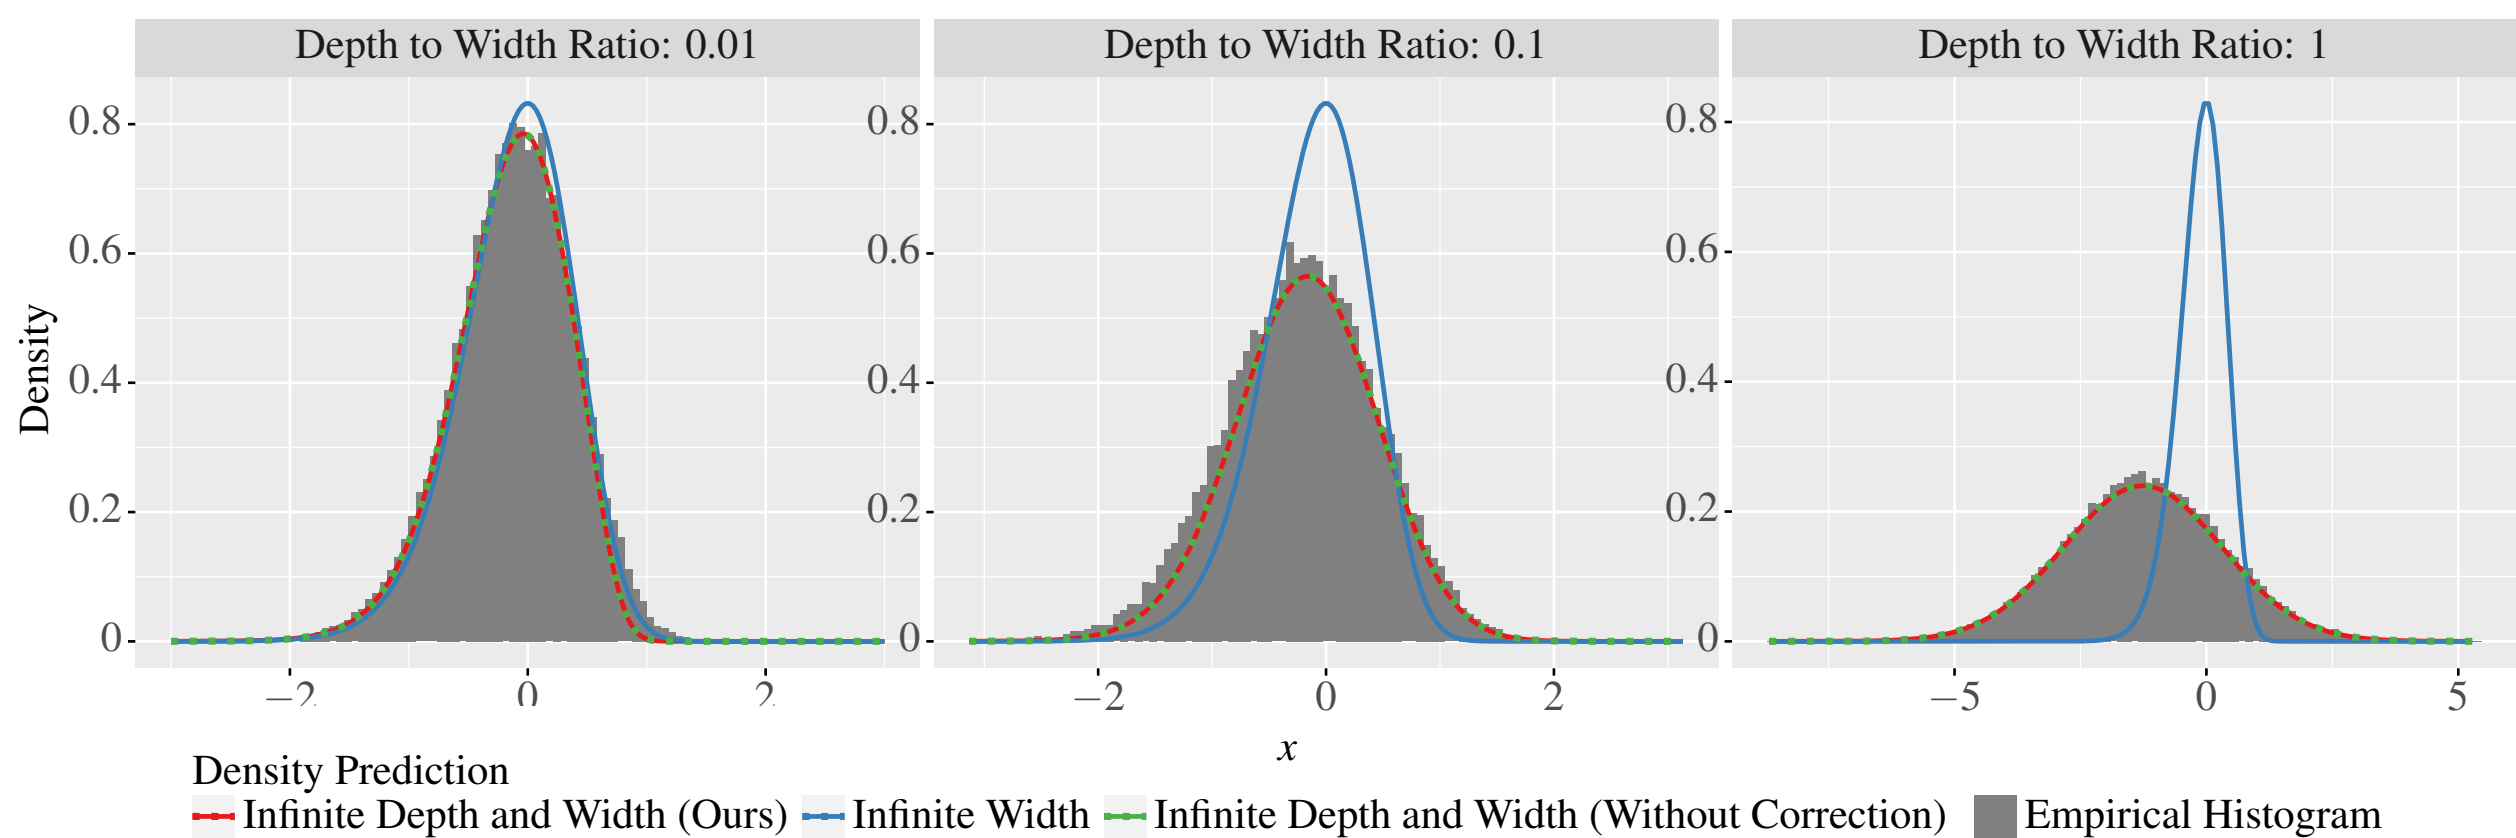

Supplement: supplementary_material [file attachment]

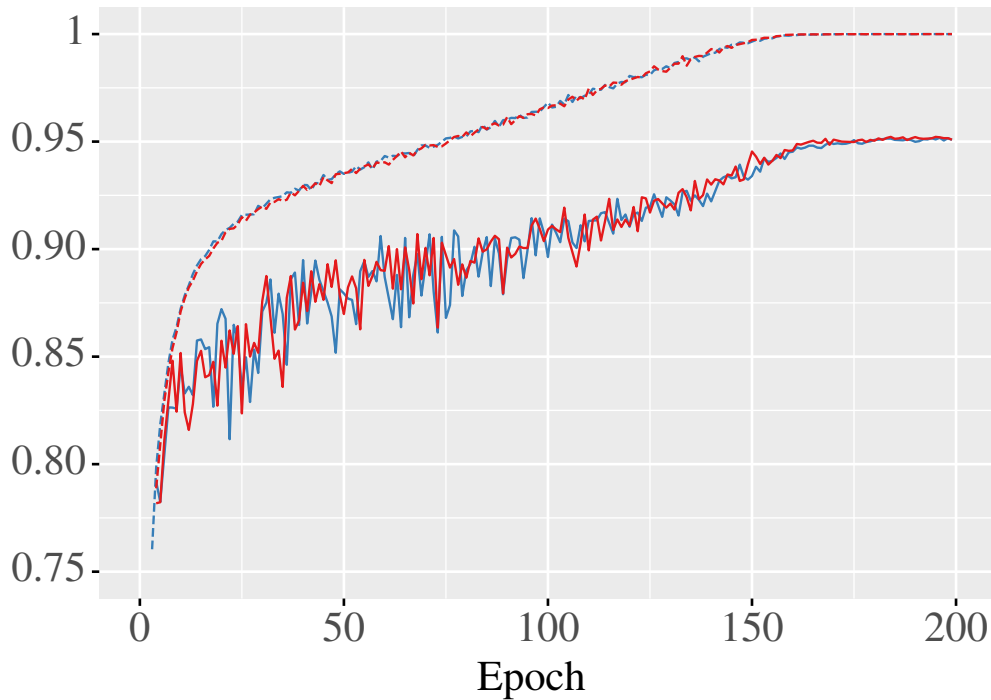

— Vanilla ResNet — Balanced ResNet ---- Training — Test

Supplement: supplementary_material [file attachment]

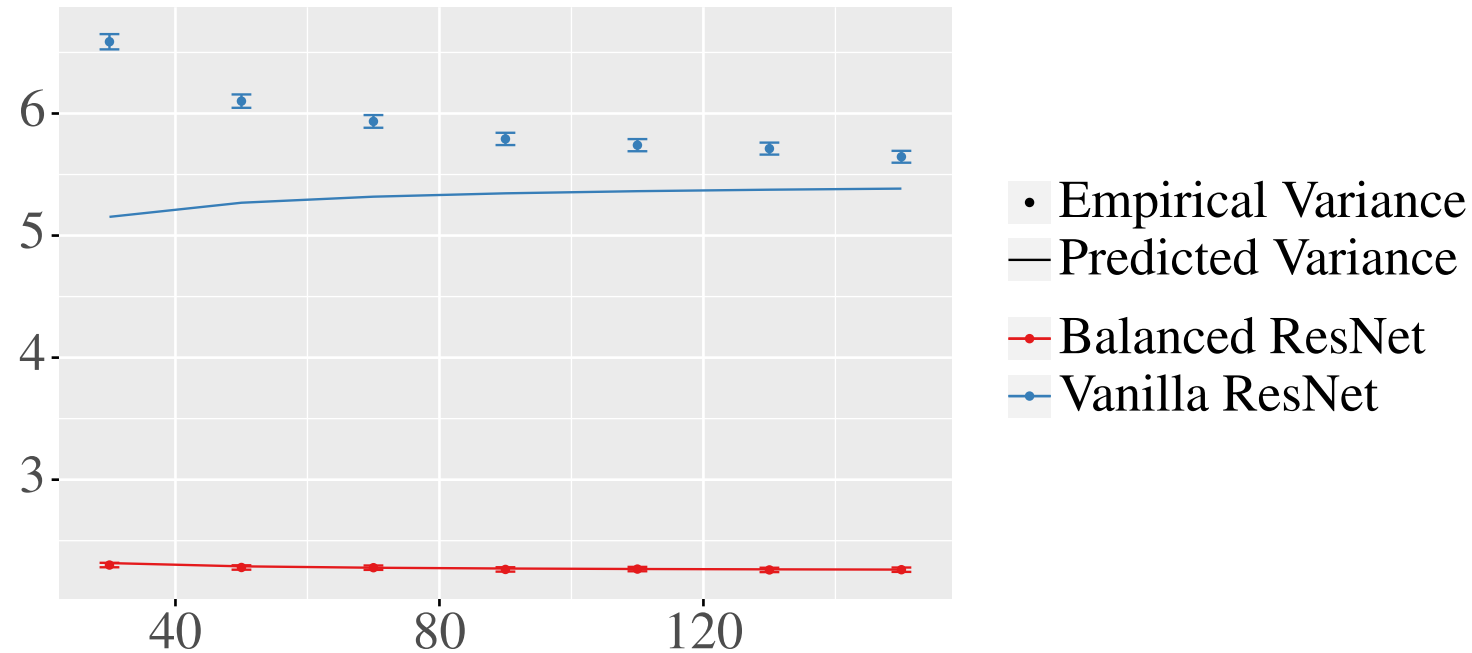

Supplement: supplementary_material [file attachment]

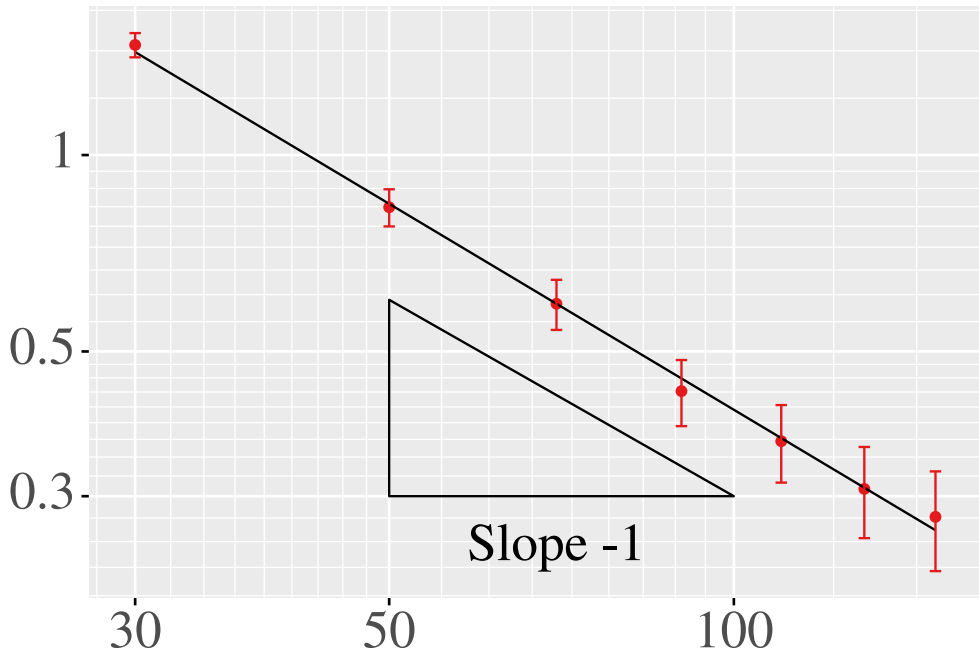

Supplement: supplementary_material [file attachment]

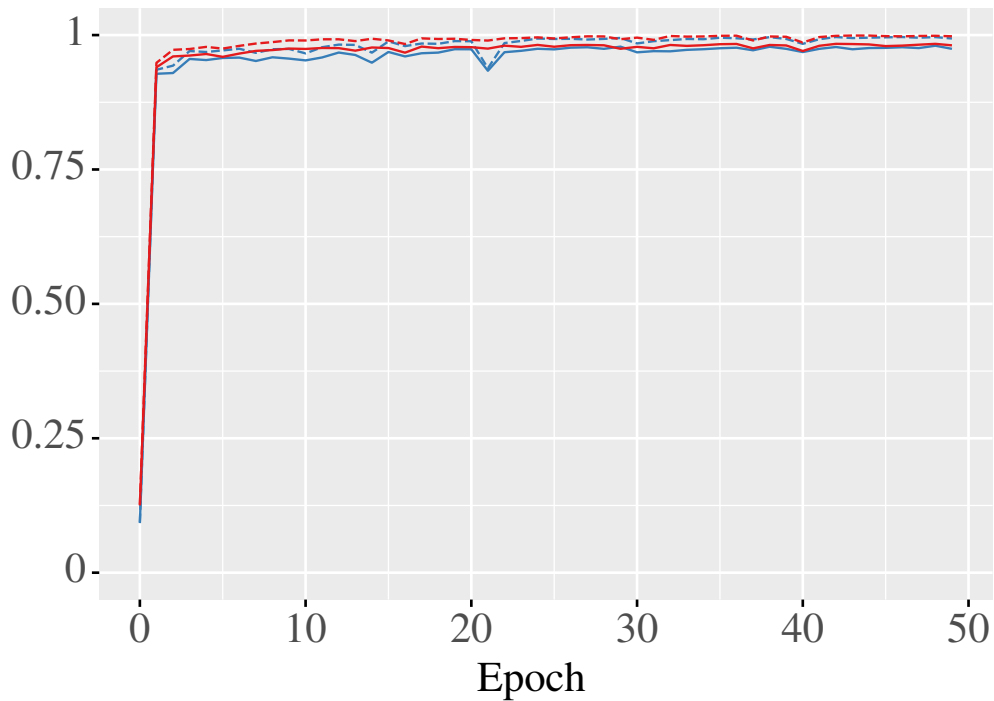

— Vanilla ResNet — Balanced ResNet - - - Training — Test

Supplement: supplementary_material [file attachment]

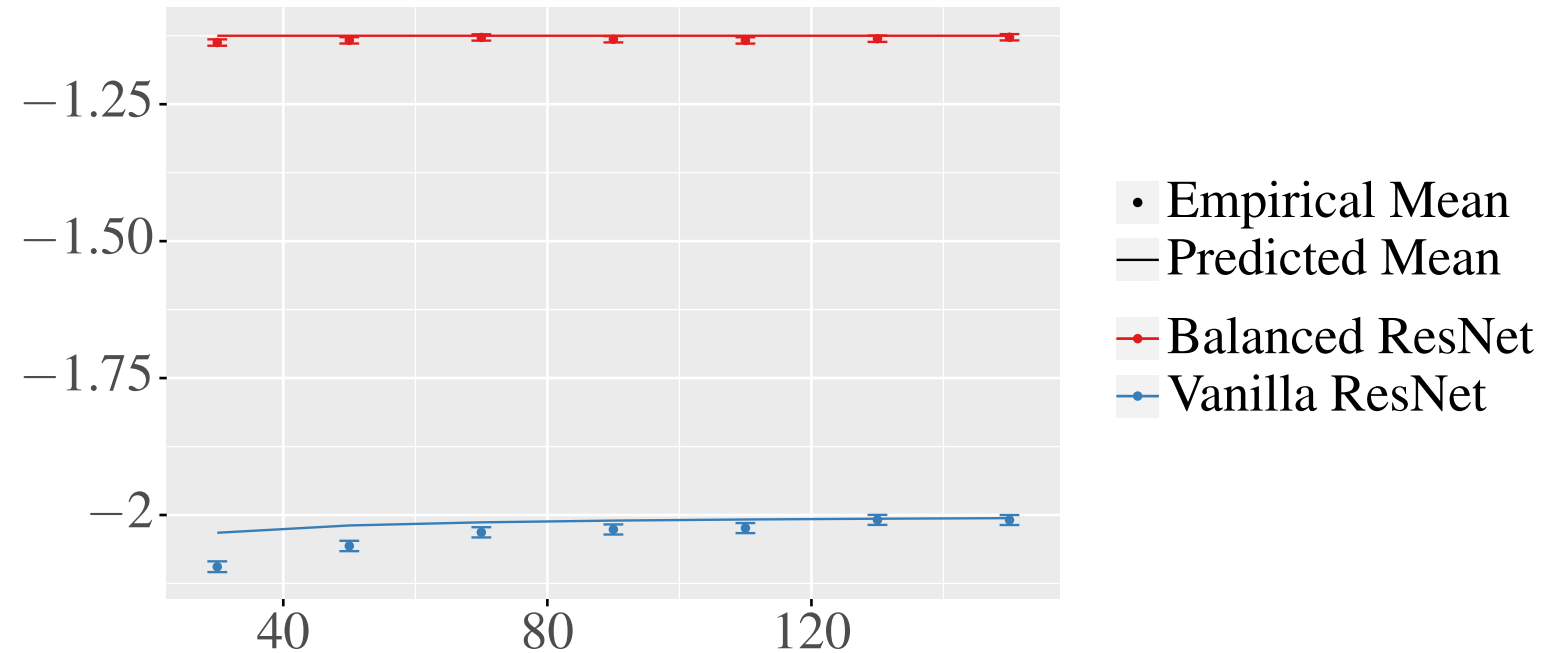

Supplement: supplementary_material [file attachment]

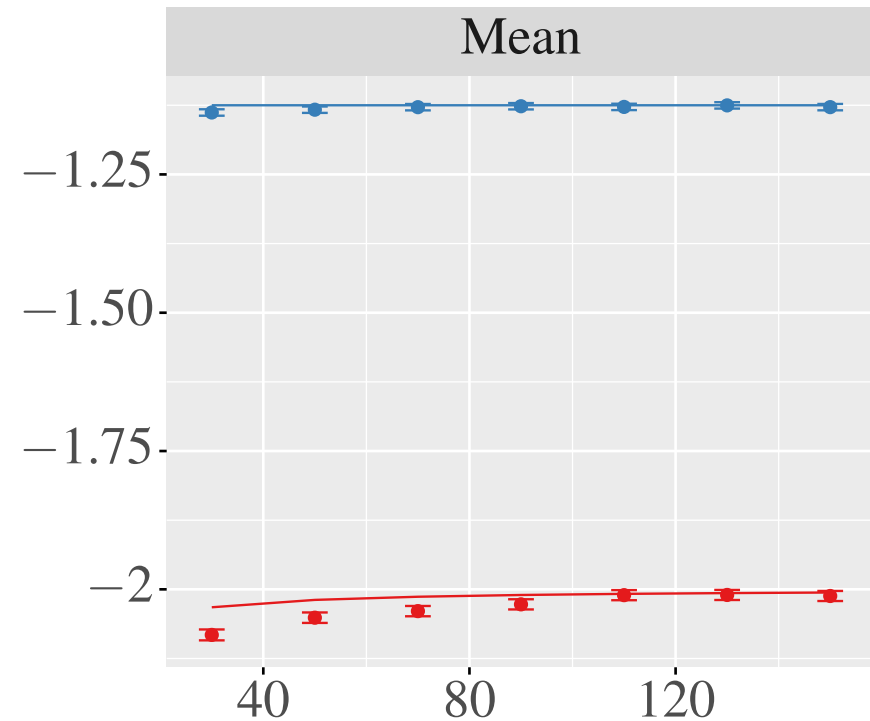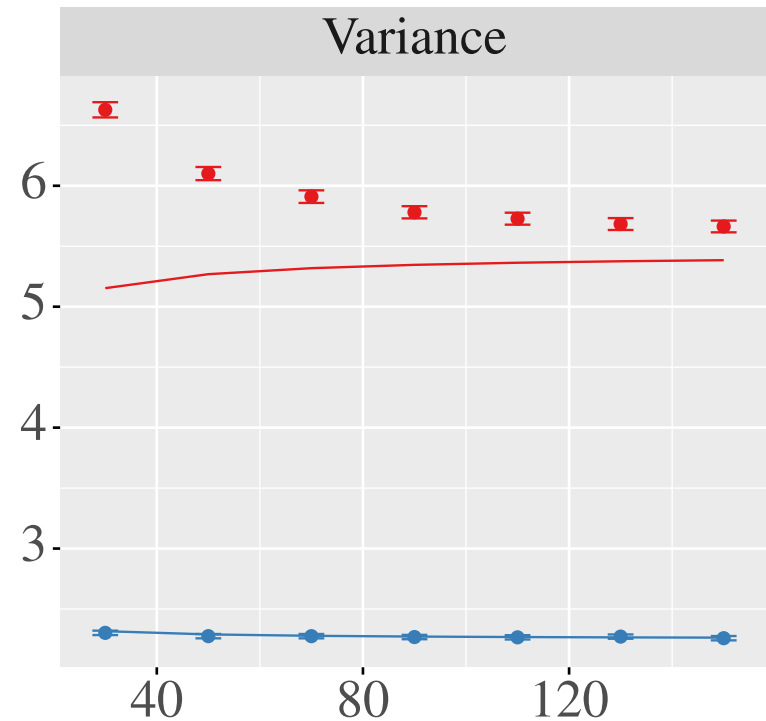

• Empirical — Predicted • Vanilla ResNet • Balanced ResNet

Supplement: supplementary_material [file attachment]

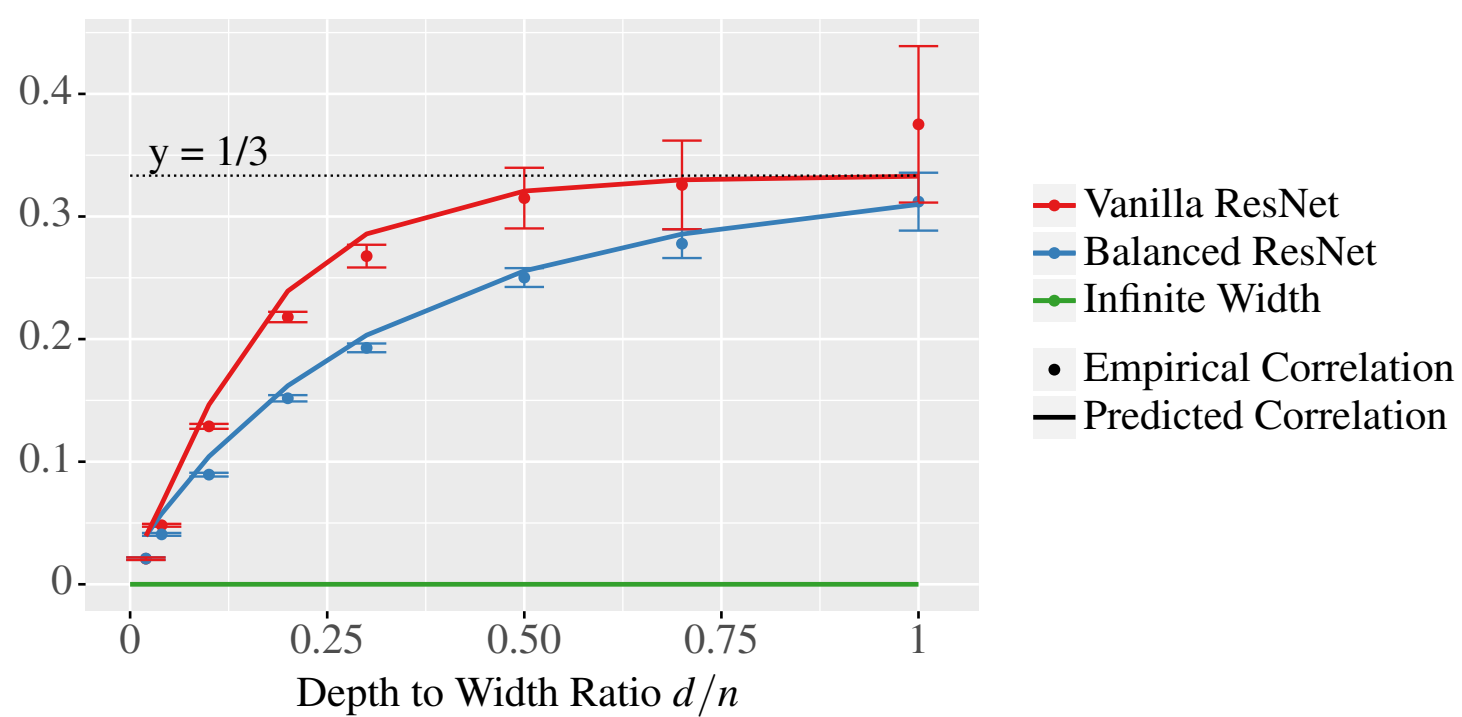

Supplement: supplementary_material [file attachment]

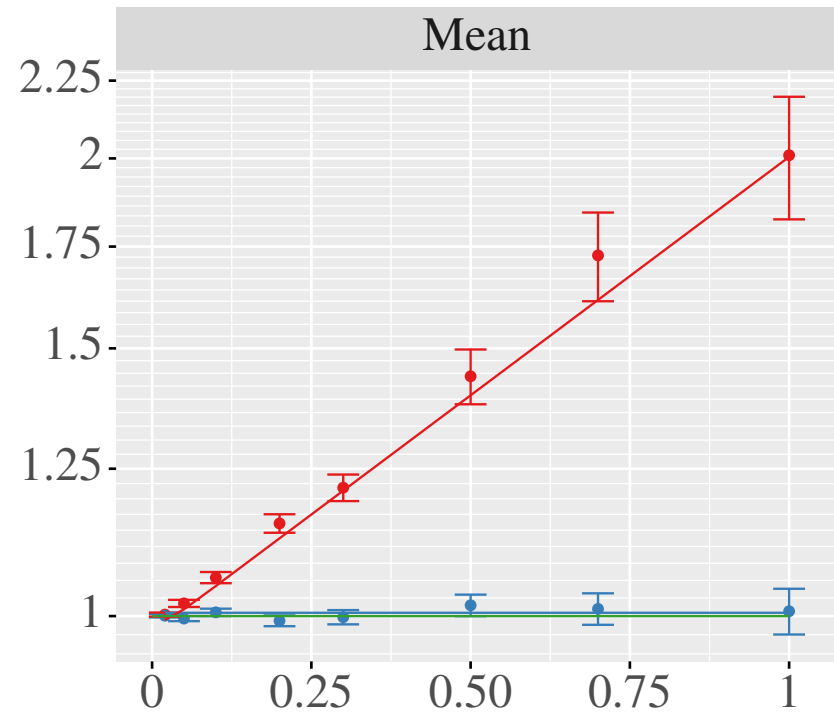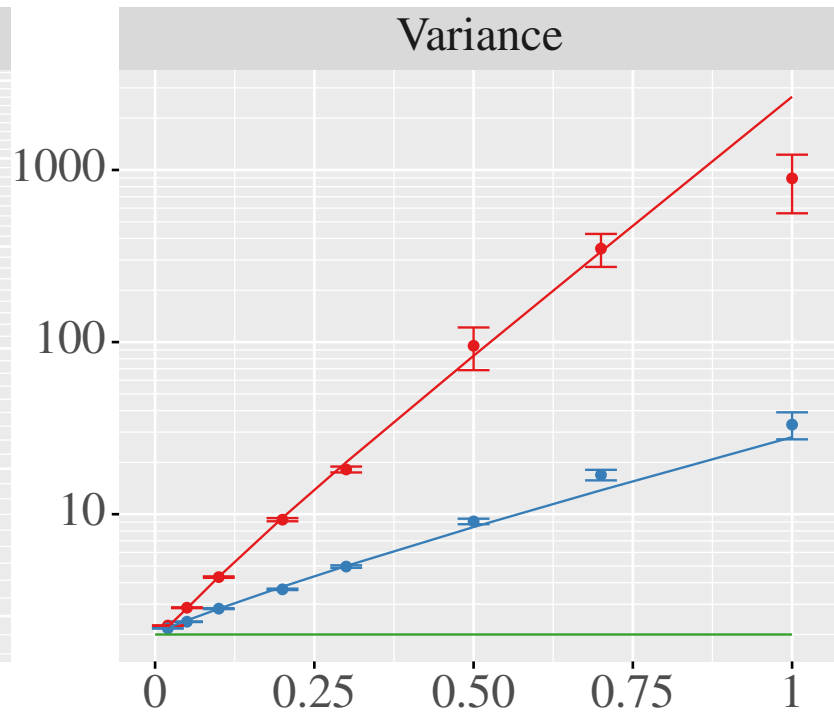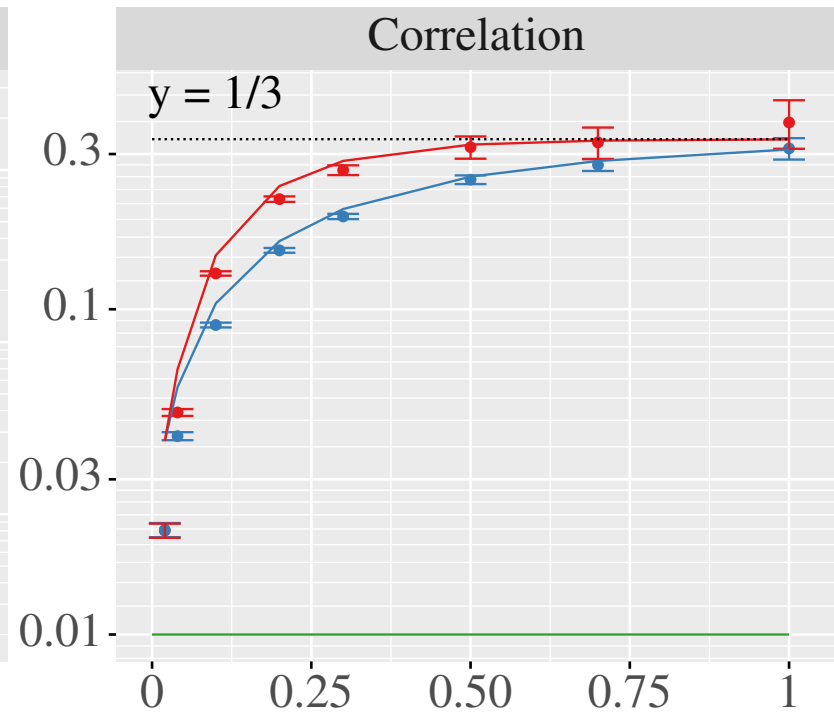

• Empirical — Predicted — Vanilla ResNet — Balanced ResNet — Infinite Width

Supplement: supplementary_material [file attachment]

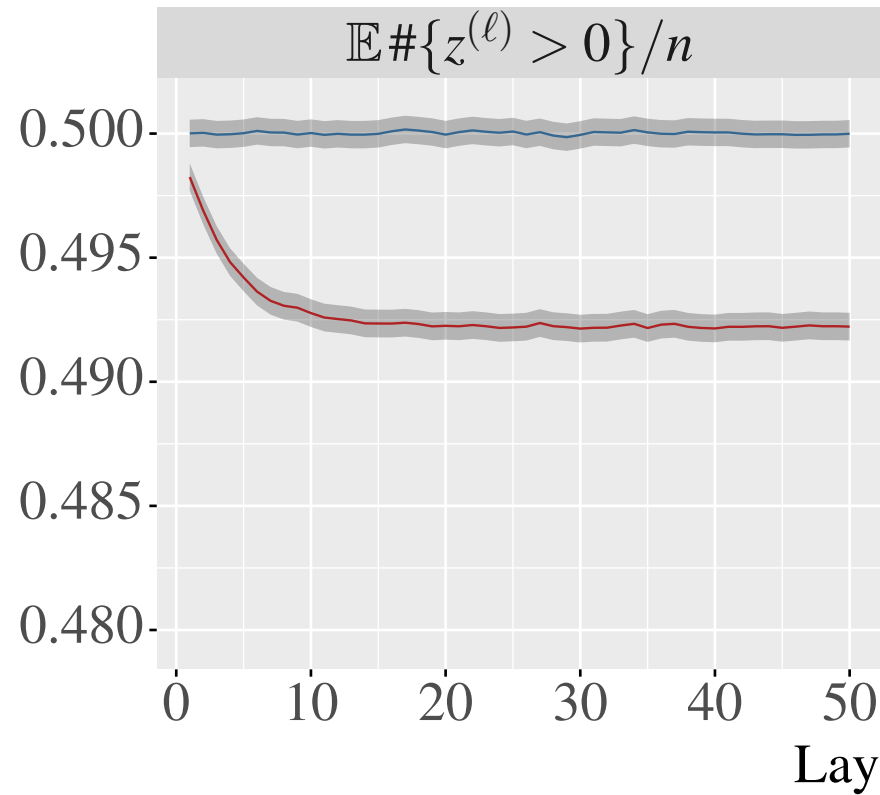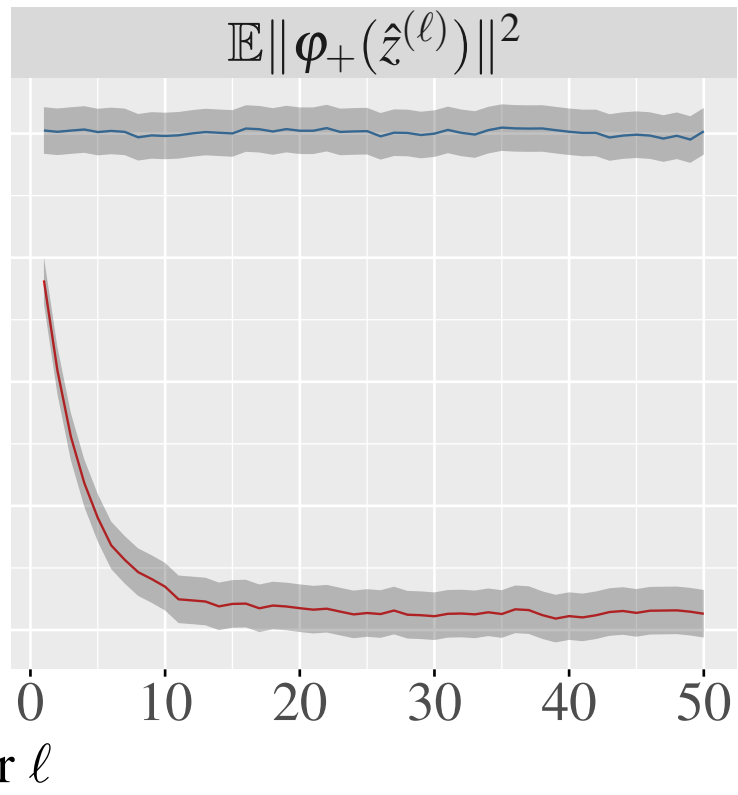

— Vanilla ResNet — Balanced ResNet

Supplement: supplementary_material [file attachment]

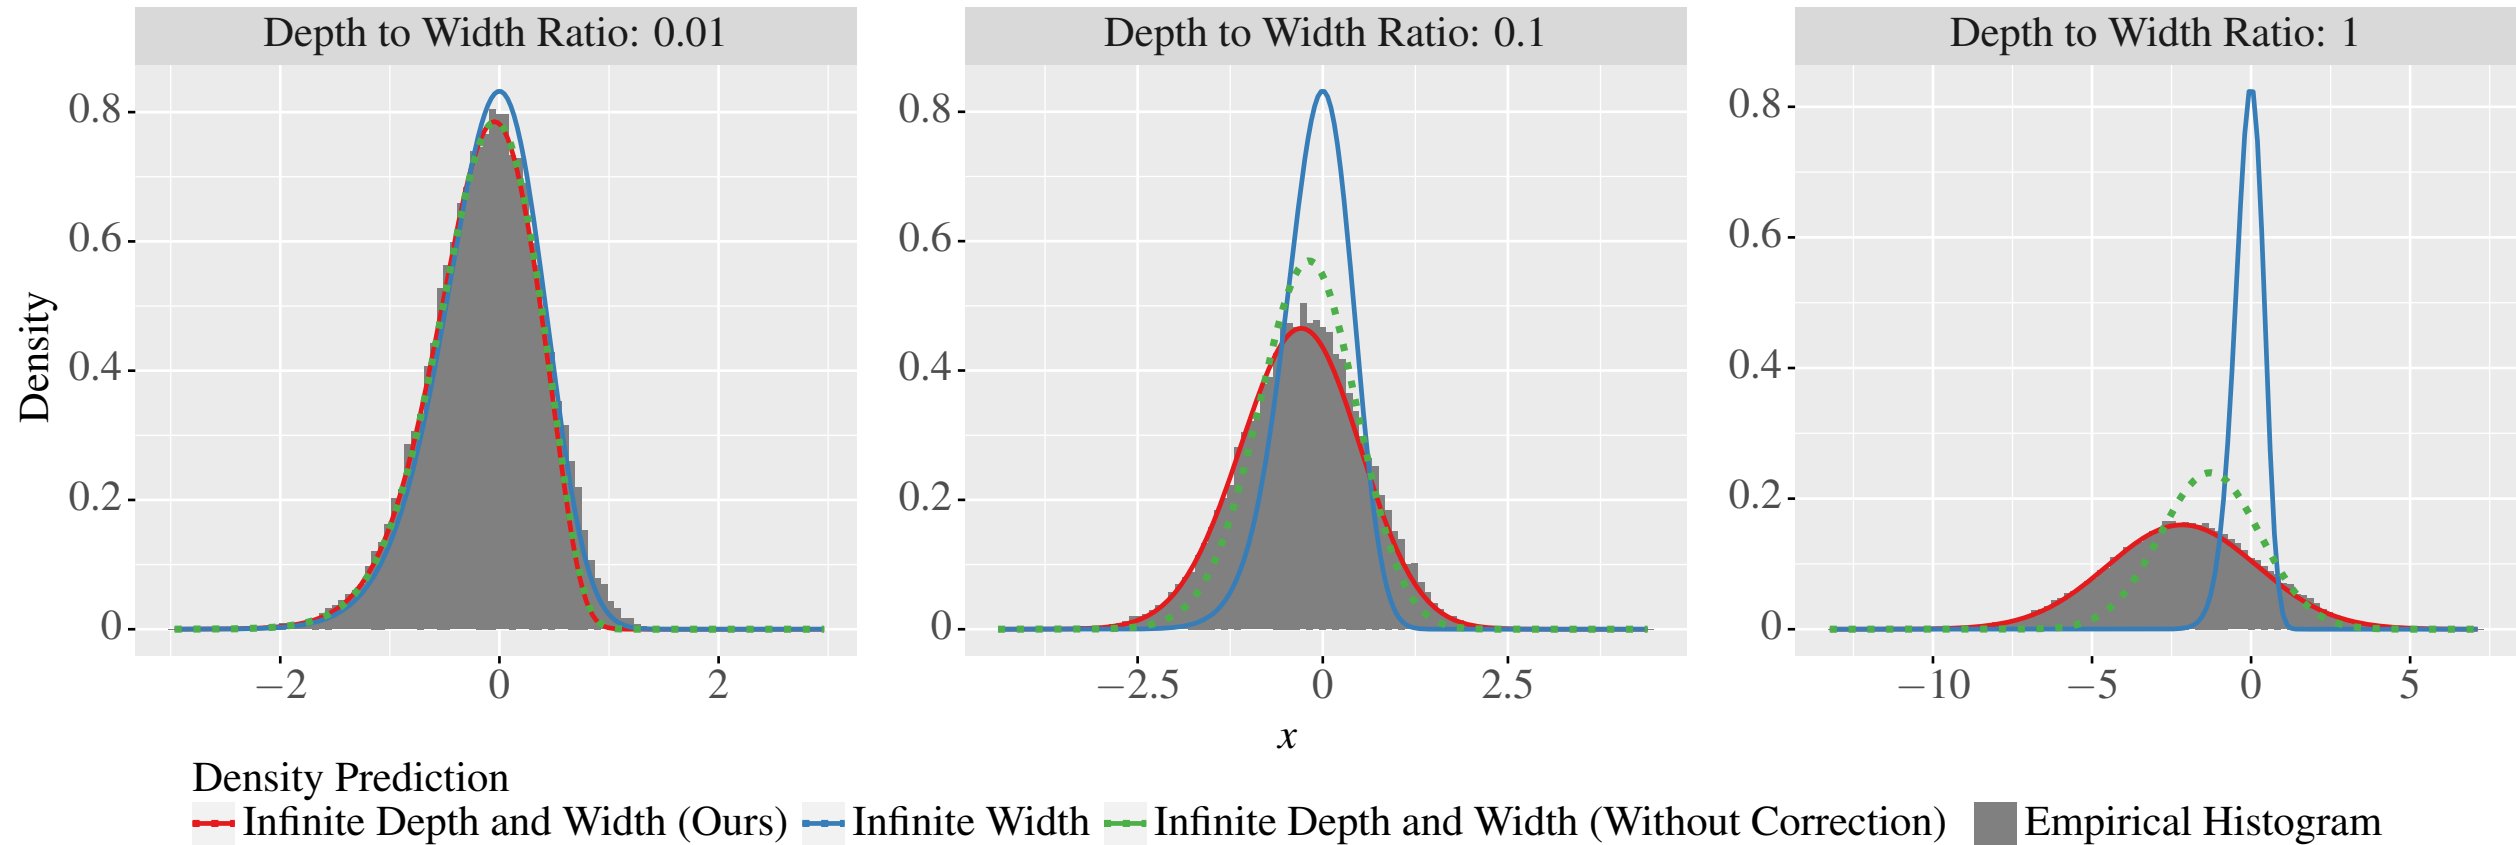

Supplement: supplementary_material [file attachment]

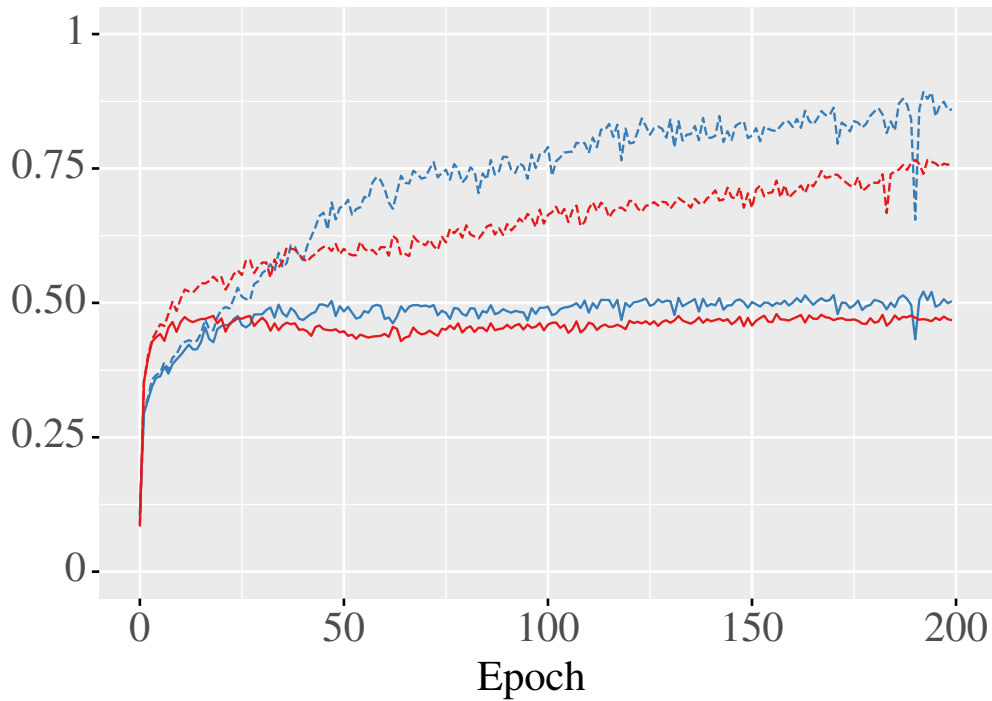

— Vanilla ResNet — Balanced ResNet ---- Training — Test

Supplement: supplementary_material [file attachment]

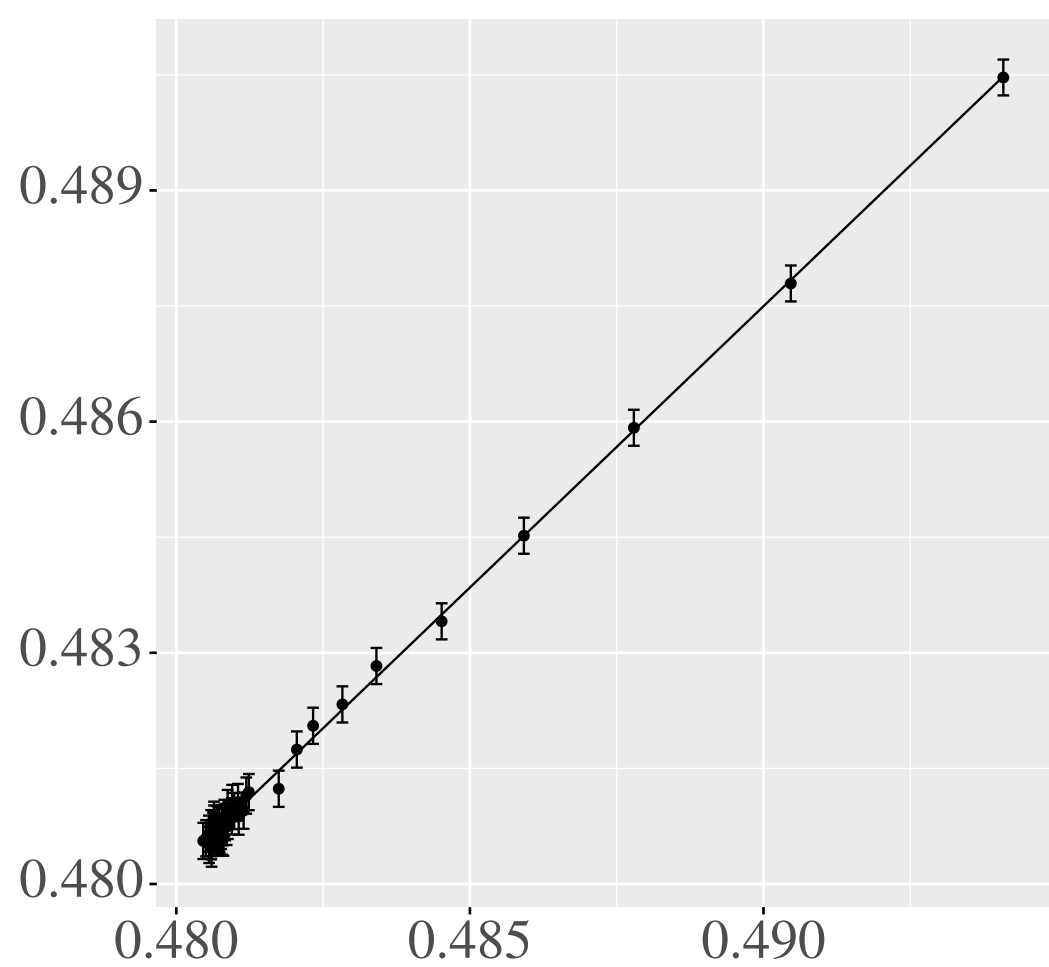

Supplement: supplementary_material [file attachment]

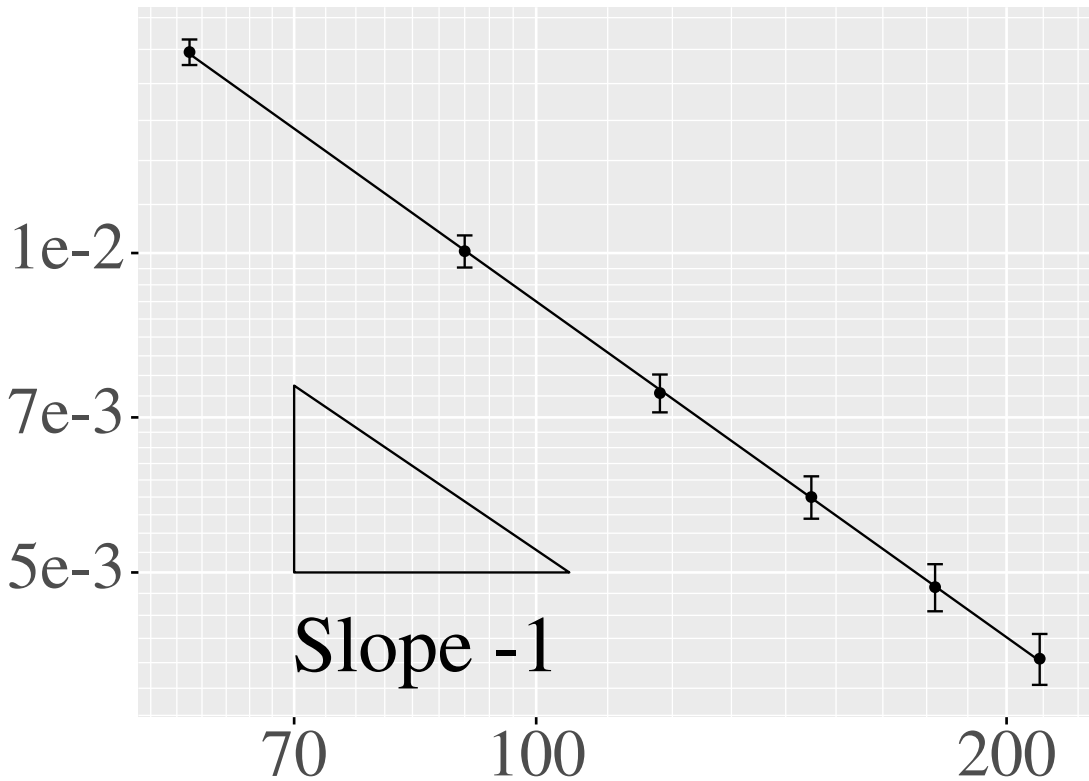

Supplement: supplementary_material [file attachment]

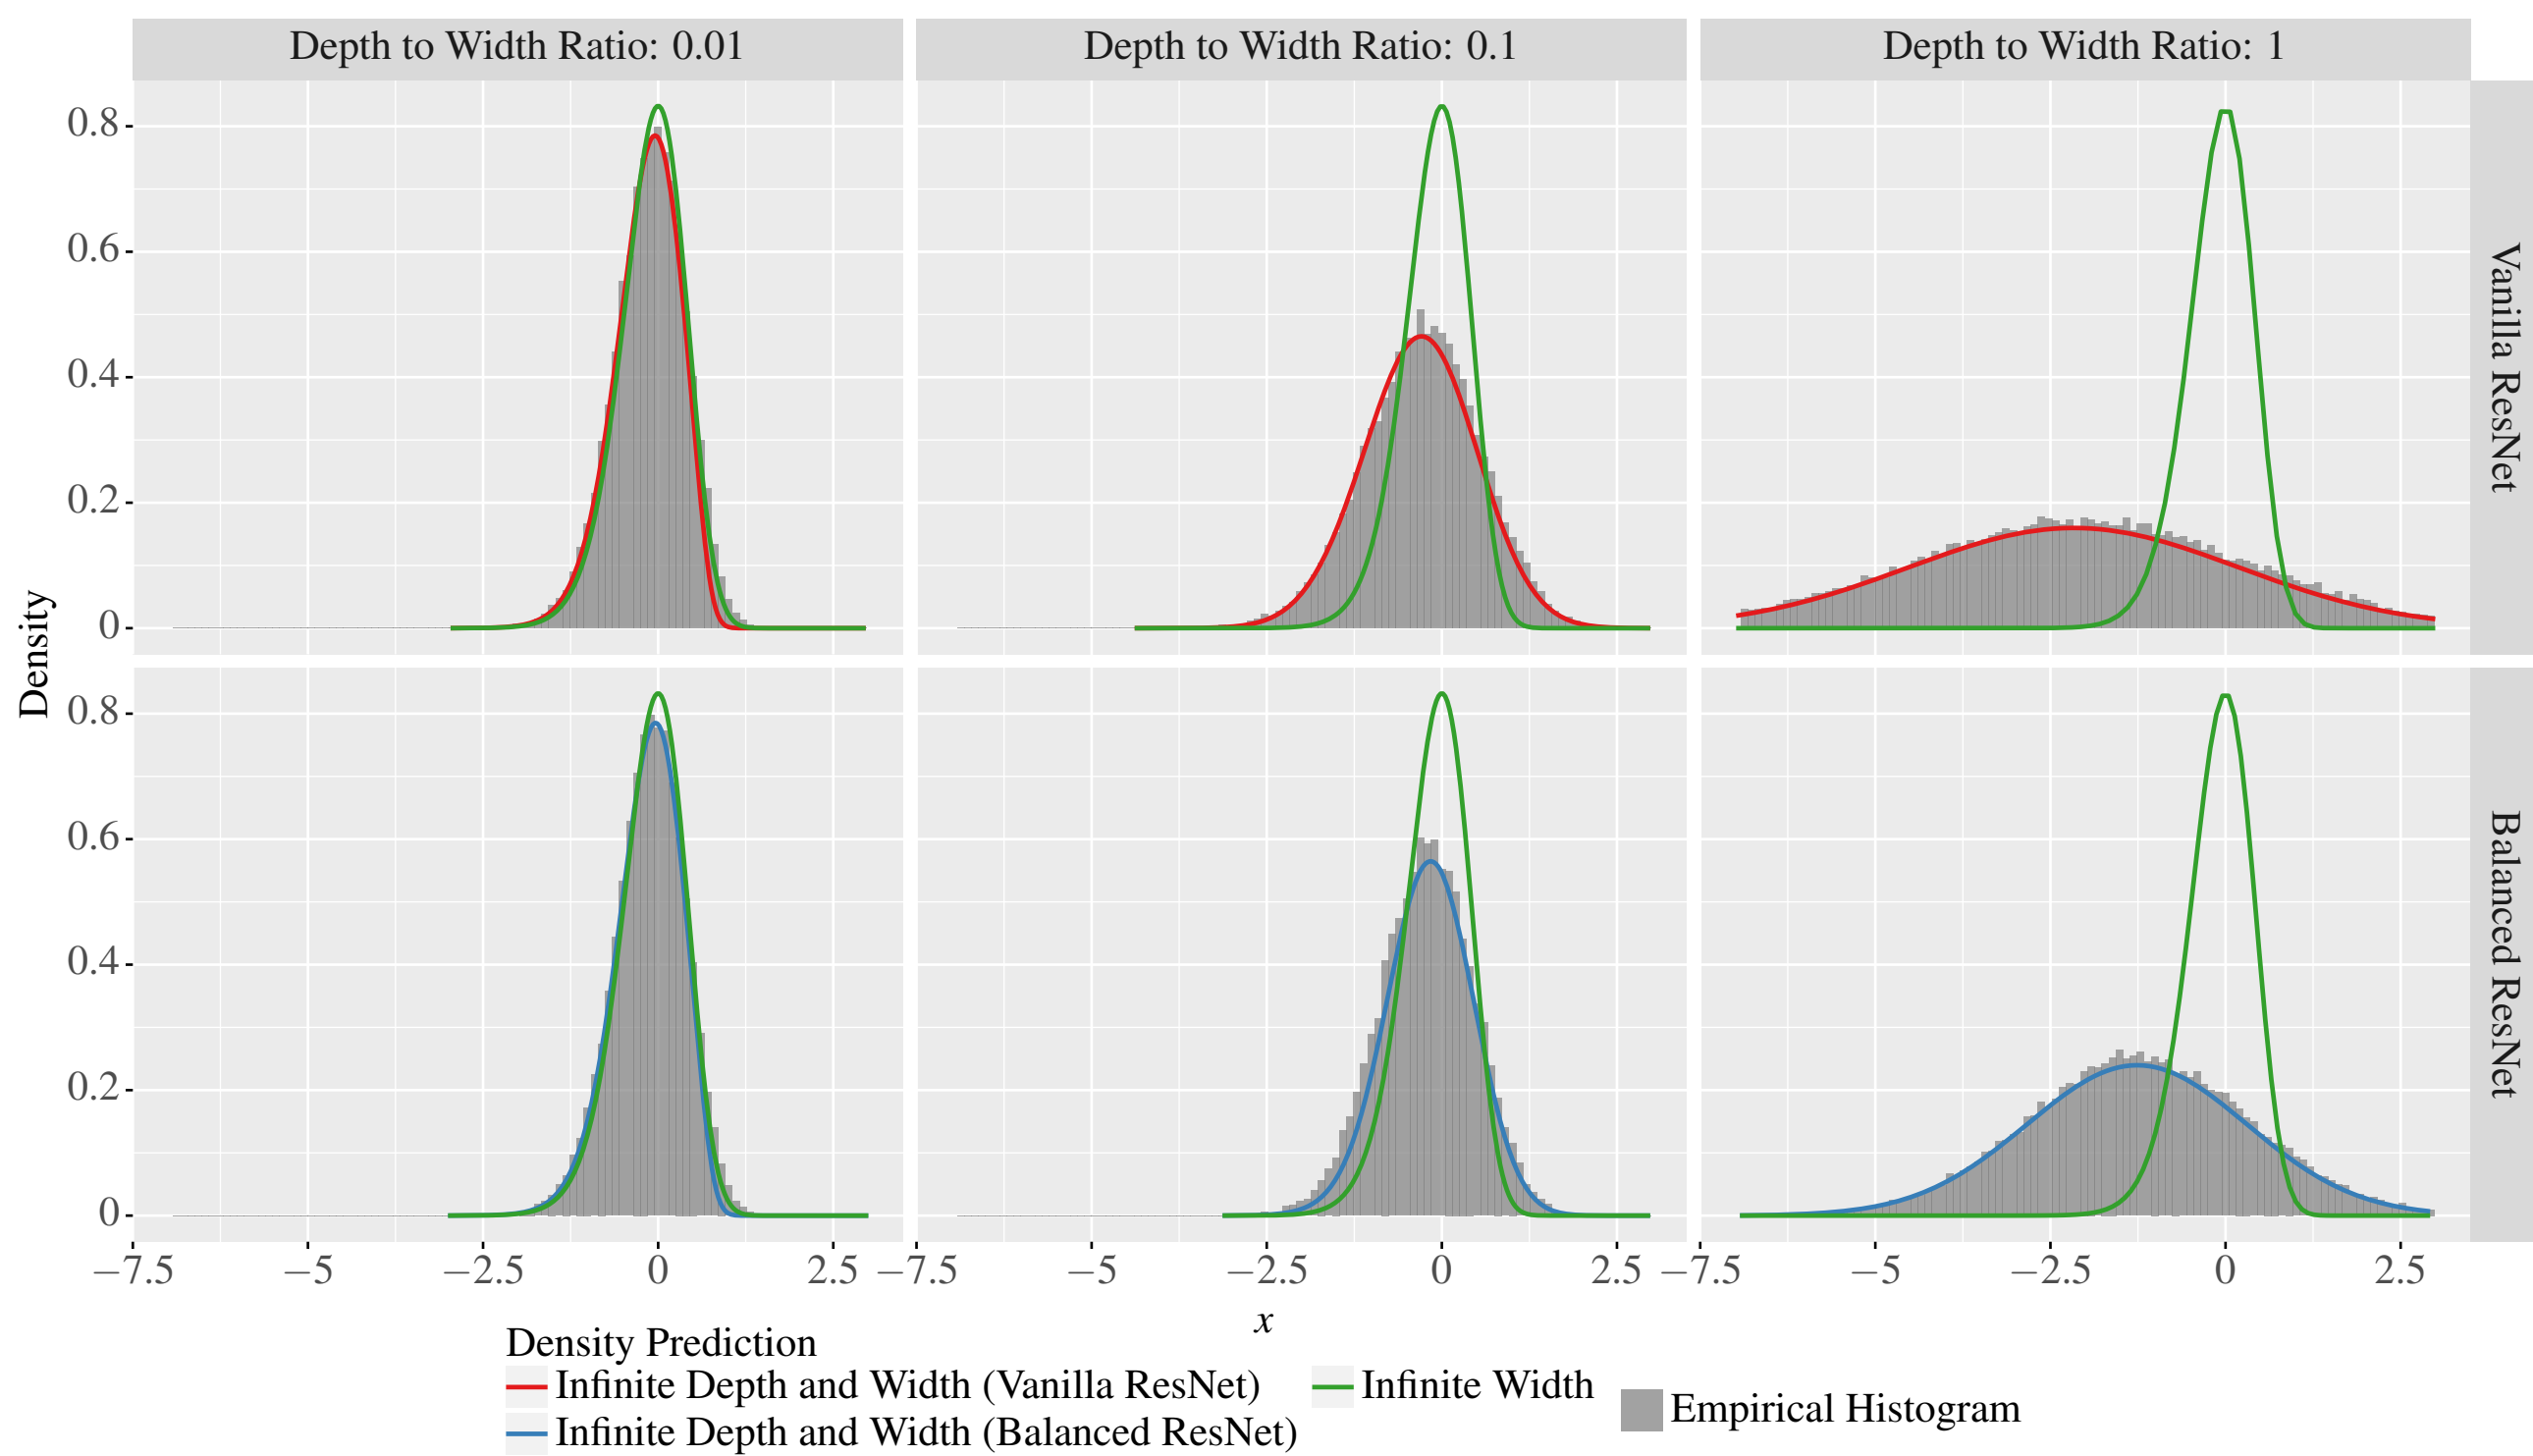

Supplement: supplementary_material [file attachment]

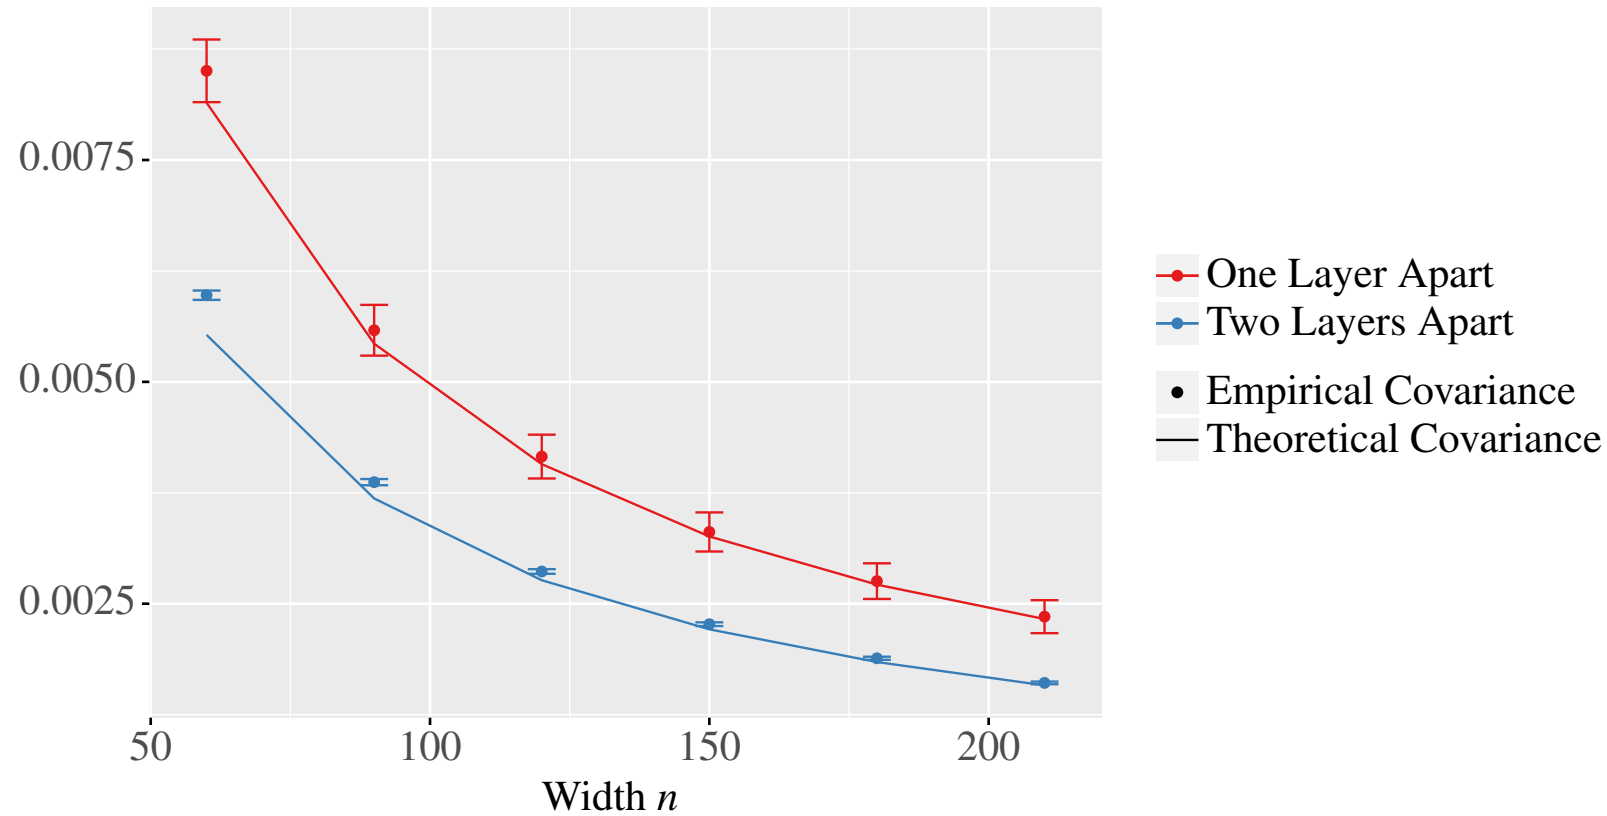

Supplement: supplementary_material [file attachment]

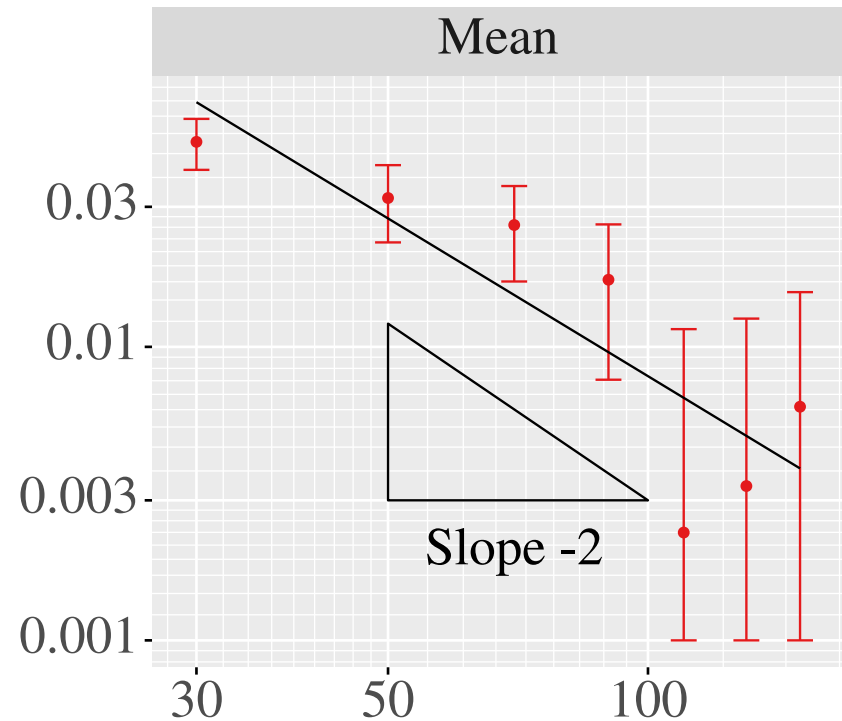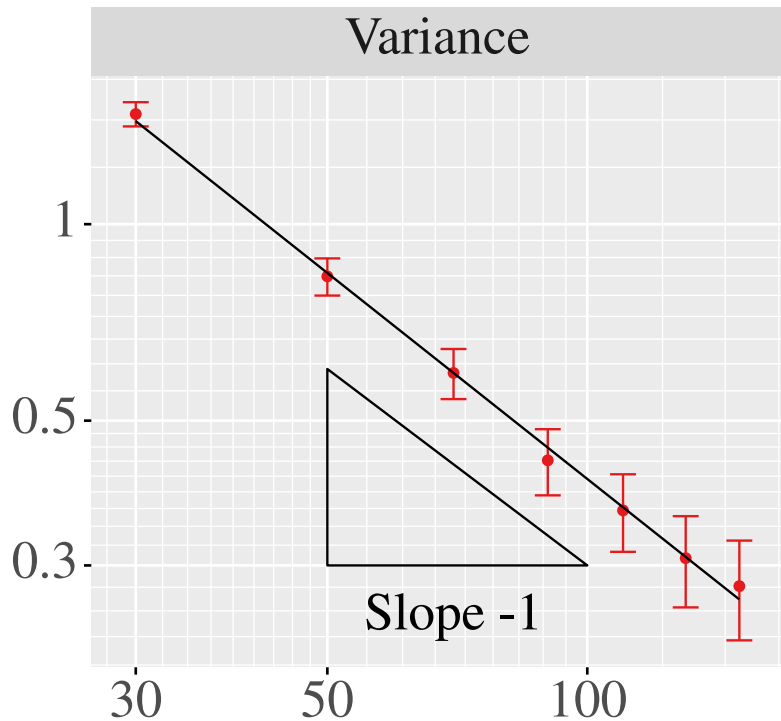

• Prediction Error — Linear Fit — Vanilla ResNet

Supplement: supplementary_material [file attachment]

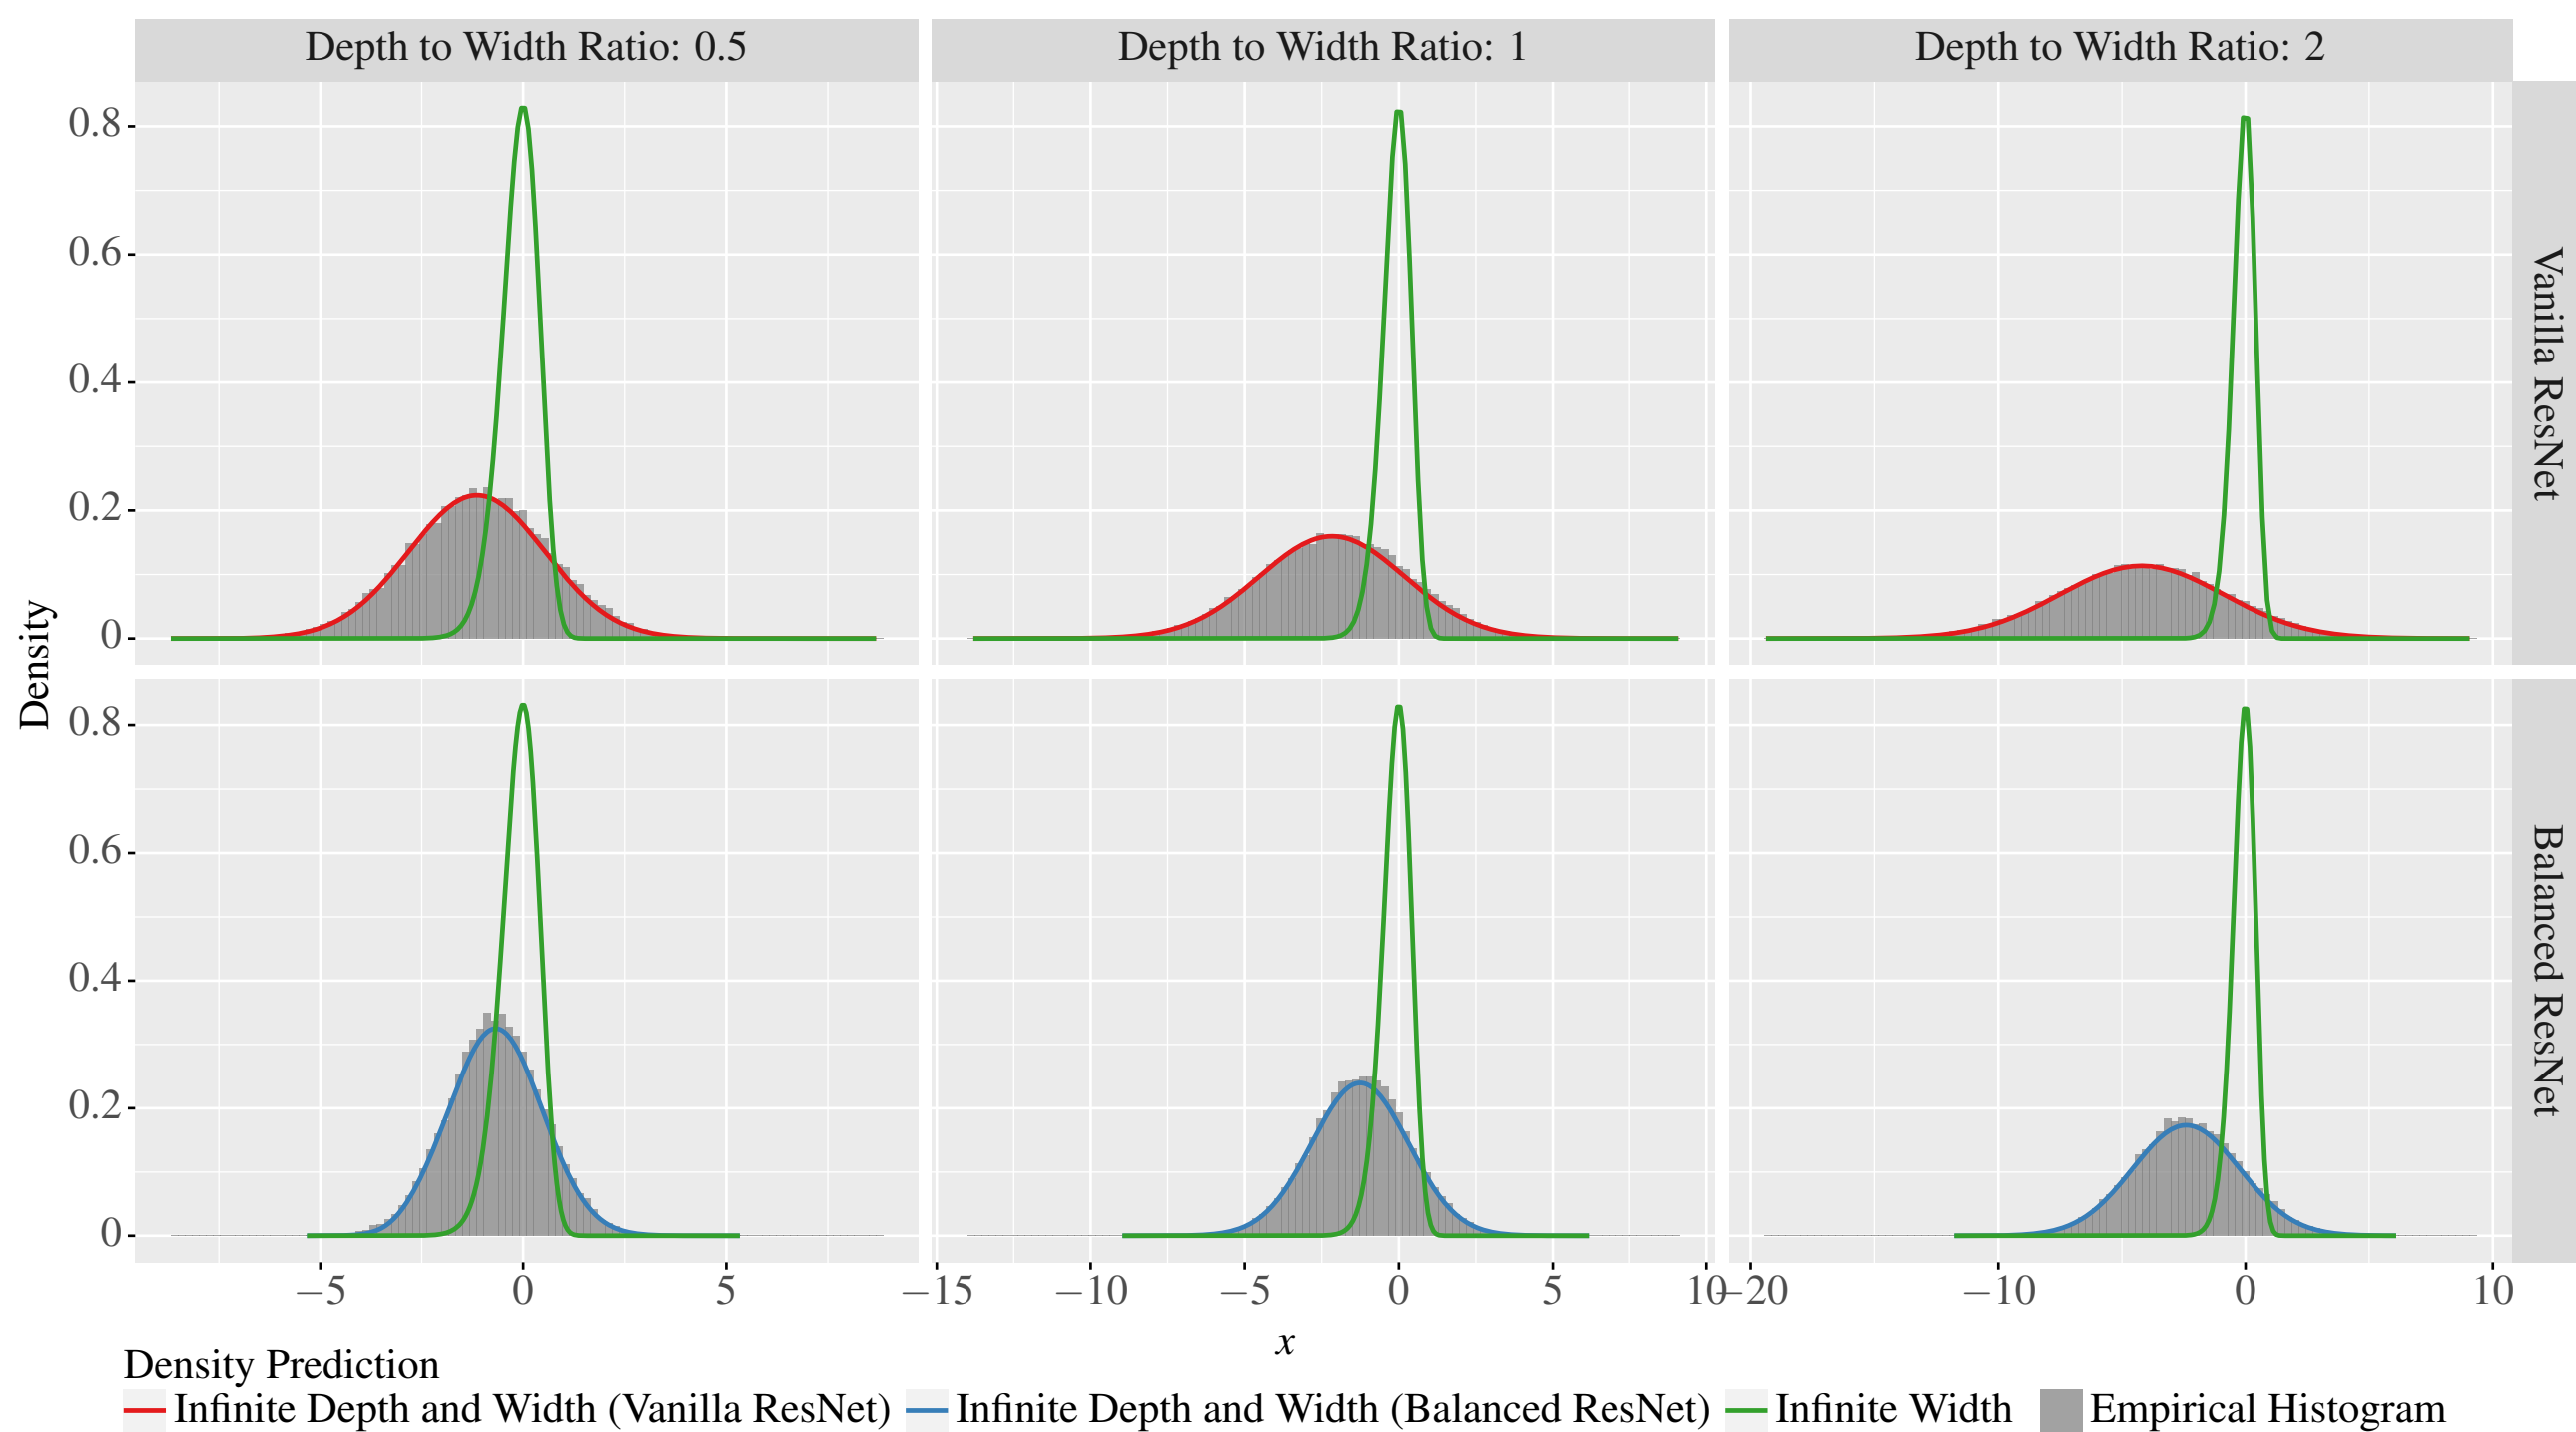

Supplement: supplementary_material [file attachment]

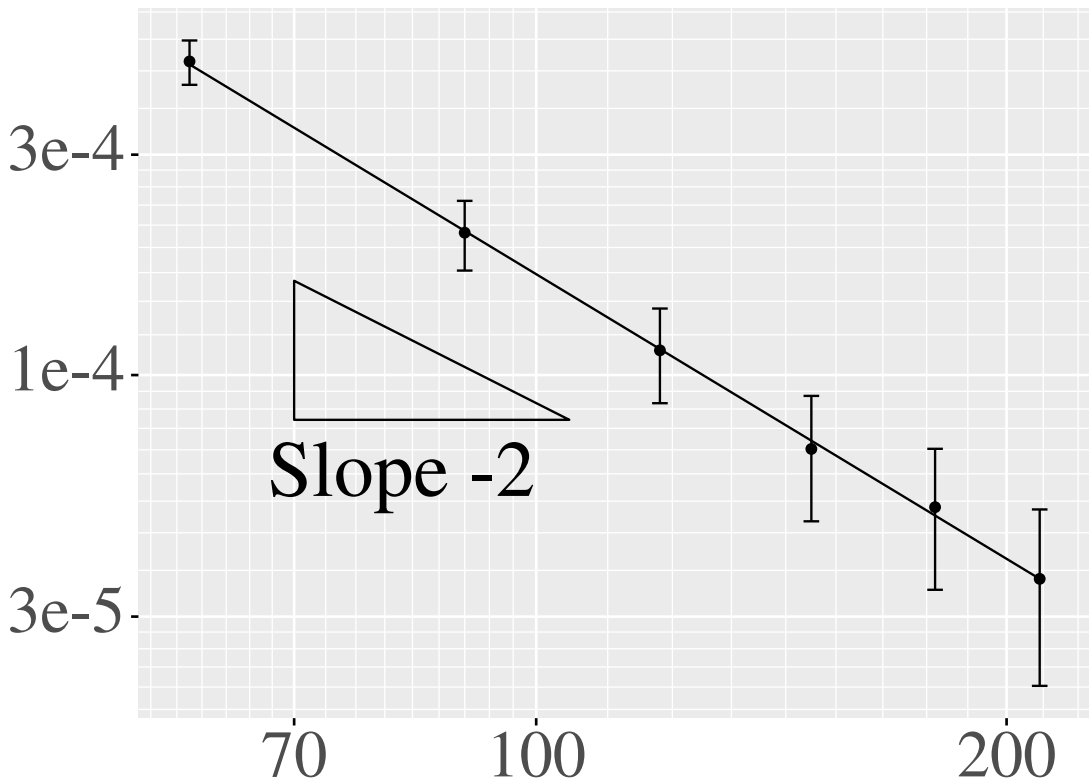

Supplement: supplementary_material [file attachment]

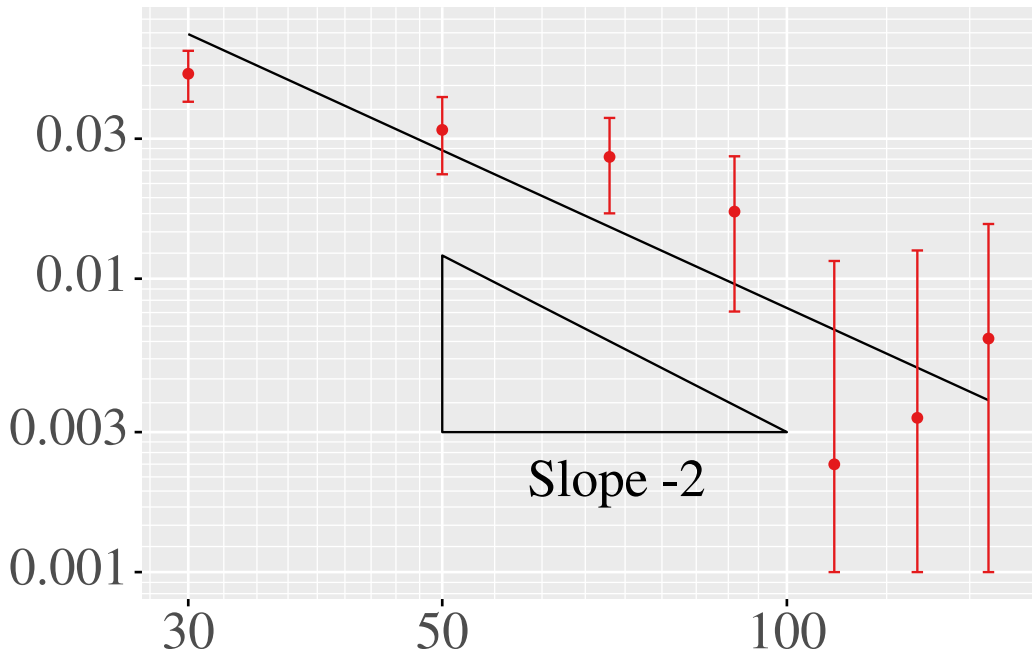

Supplement: supplementary_material [file attachment]

Mean

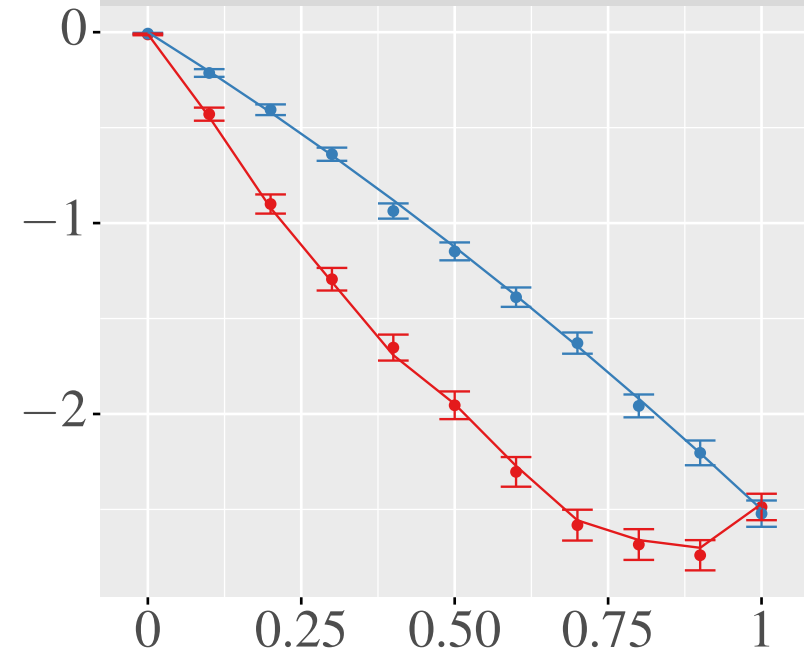

Variance

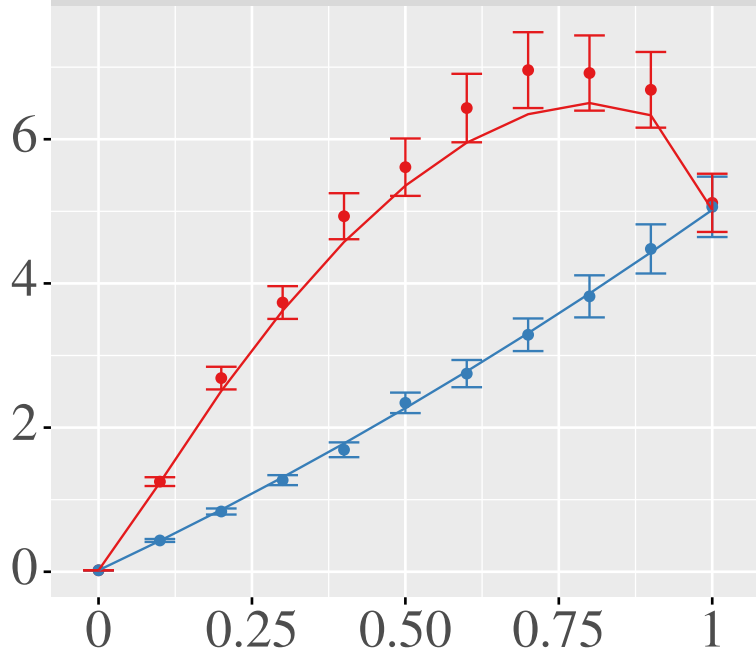

—●— Vanilla ResNet —●— Balanced ResNet

Supplement: supplementary_material [file attachment]

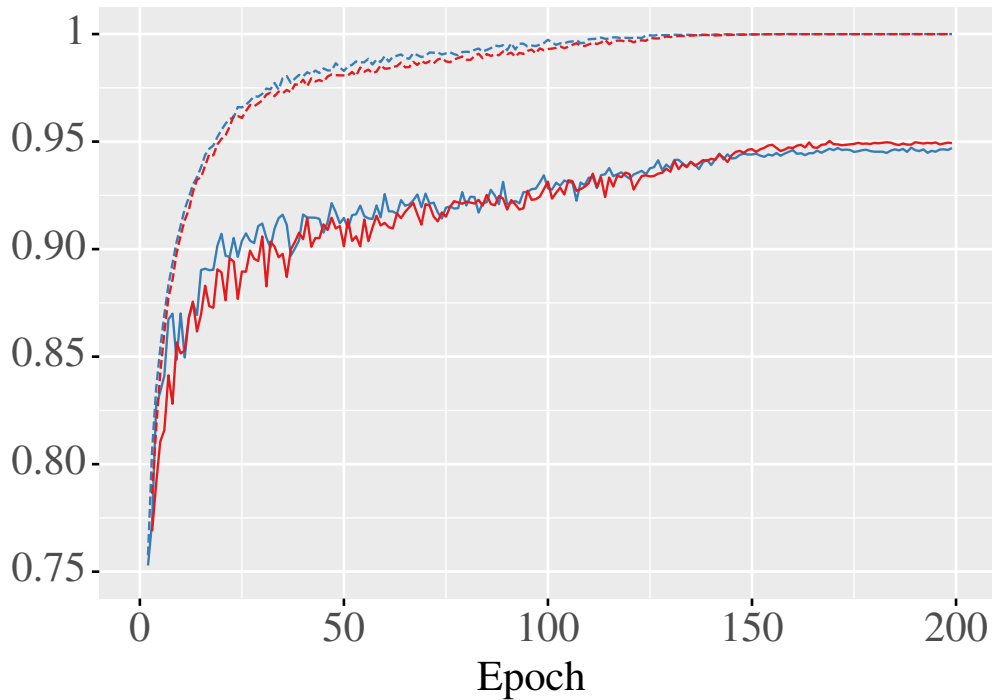

— Vanilla ResNet — Balanced ResNet ---- Training — Test

Supplement: supplementary_material [file attachment]

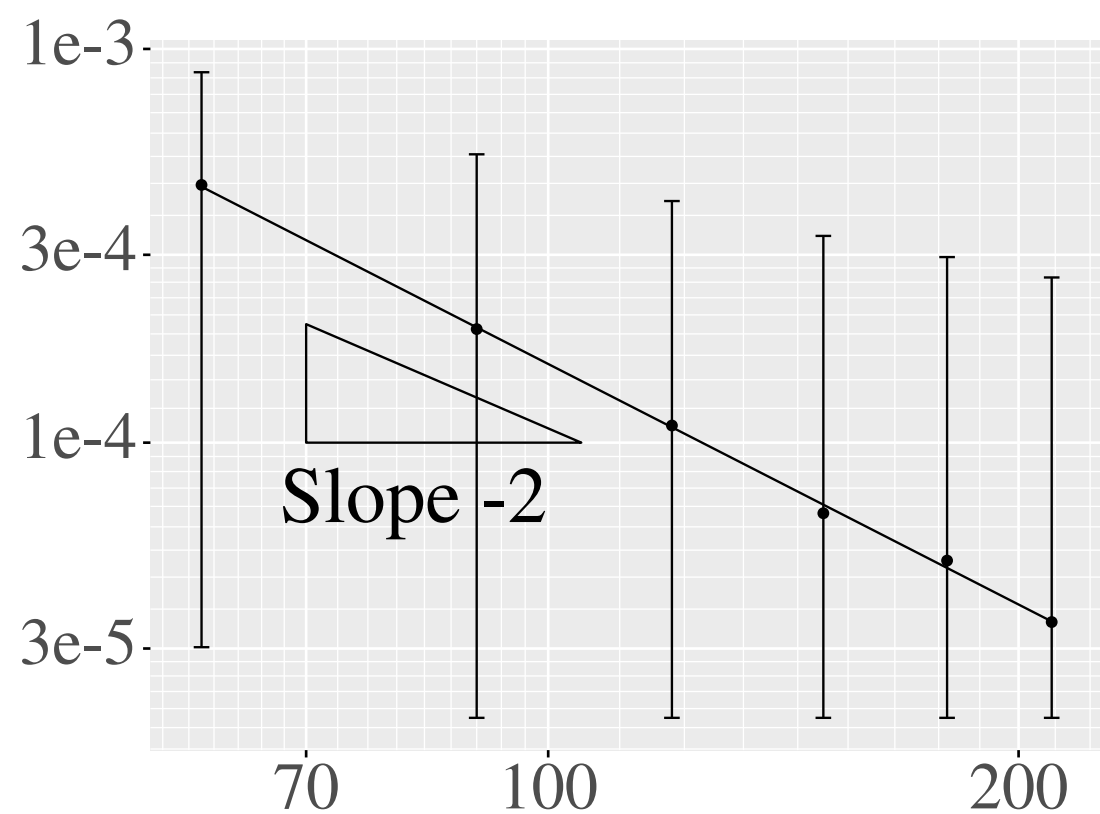

Supplement: supplementary_material [file attachment]

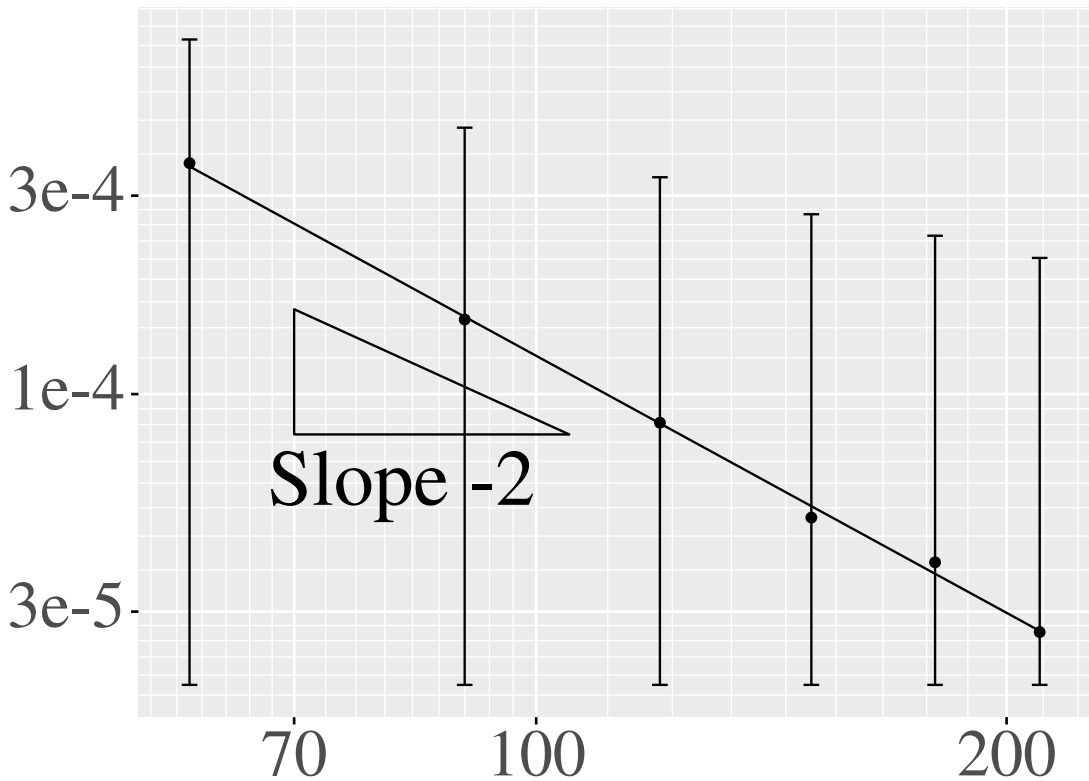

Supplement: supplementary_material [file attachment]
